# Supplementary material for: Tumor necrosis factor-inducible gene 6 protein ameliorates chronic liver damage by promoting autophagy formation in mice
Source: PubMed Central journal article supplement — Exp Mol Med. 2017 Sep 22;49(9):e380–. doi: 10.1038/emm.2017.140 (PMC5628276; doi:10.1038/emm.2017.140), 2017-09-22

## Supplementary information

### **Tumor Necrosis Factor-Inducible Gene 6 Protein Ameliorates Chronic Liver Damage by Promoting Autophagy Formation in Mice**

#### **Supplementary Table 1. Sequences of primers used for qRT-PCR**

#### **Supplementary Figure 1. TSG-6 decreases inflammation in the liver of MCDE-treated mice.**

qRT-PCR analysis of murine livers for  $\text{tnf}\alpha$ ,  $\text{Il-1}\beta$ ,  $\text{cxcl1}$  and  $\text{cxcl2}$ . Mean $\pm$ SD results are plotted ( $n \geq 4$  mice / group) (\* $p < 0.05$ )

#### **Supplementary Figure 2. TSG-6 protects hepatocytes from PA-induced cell death by activating autophagy processes.**

(a) Cell viability of AML12 cells treated with TSG-6 was analyzed using an MTS assay. After being exposed to palmitic acid (PA) (400  $\mu\text{M}$ ) for 24 hours, AML12 cells were treated with vehicle (PA), 3-MA (PA+3-MA) or TSG-6 with (PA+TSG-6+3-MA) or without 3-MA (PA+TSG-6) for 24 and 48 hours. As a control, AML12 cells were treated with equal volumes of vehicle without PA. The mean $\pm$ SEM results obtained from three identical experiments are plotted. (b) Western blot assay and (c) cumulative densitometry analyses for LC3-II in these cell groups. GAPDH was used as an internal control. Data shown represent one of three experiments with similar results and the mean $\pm$ SEM results obtained from three identical experiments are plotted (\* $p < 0.05$  vs PA, # $p < 0.05$  vs PA+TSG-6 with 3-MA, & $p < 0.05$  vs PA+3-MA, \$ $p < 0.05$  vs control).

#### **Supplementary Figure 3. TSG-6 is involved in activating CMA in ER stress-induced hepatocytes, increasing hepatocyte viability.**

(a) qRT-PCR and (b) western blot assays of LAMP2A in the AML12 cells treated with either

27 scramble (scr) or *lamp2a* siRNA (si). GAPDH was used as an internal control. Immunoblots shown  
28 represent one of three experiments with similar results. Mean±SD results obtained from three  
29 identical experiments are plotted (\*p<0.05 vs scr). (c) Either scr or *lamp2a* siRNA-transfected  
30 AML12 cells were exposed to either tunicamycin (TM) (5 ng/ml) or palmitic acid (PA) (400 μM) for  
31 24 hours, and then were treated with either vehicle or TSG-6 for 24 and 48 hours. Cell viability of  
32 these cells was assessed using an MTS assay. The mean±SEM results obtained from three identical  
33 experiments are plotted. (d) qRT-PCR analysis of *atg3*, *atg7*, *lc3*, and *lamp2a* expression in these cells  
34 damaged by either TM (d) or (e) PA. Data represent the mean±SEM of three independent experiments  
35 (\$p<0.05 vs Control (scr-transfected cells with vehicle), \*p<0.05 vs TM or PA with scramble RNA,  
36 #p<0.05 vs TM or PA+TSG-6 with *lamp2a* siRNA, &<0.05 vs TM or PA with *lamp2a* siRNA).

37

38 **Supplementary Figure 4. 3-MA, an autophagy inhibitor, rarely affects the healthy liver.**

39 (a) H&E-stained liver sections from representative normal mice with (normal+3-MA) or without 3-  
40 MA (normal) treatment (X40). (b) The ratios of liver to body weight (LW/BW) of these mice. (c)  
41 qRT-PCR analysis for *atg3*, *atg7* and *lc3* in livers from control mice treated with vehicle or 3-MA.  
42 The results are displayed as the mean±SEM (n ≥ 3 mice / group). (d) Western blot analysis for LC3 in  
43 these groups. GAPDH was used as an internal control. Data shown represent one of three experiments  
44 with similar results.

45

46

47

48

**S1 Table. Sequences of primers used for qRT-PCR**

---

Mouse

---

| Gene                           | Forward sequence        | Reverse sequence        |
|--------------------------------|-------------------------|-------------------------|
| <i>atg3</i>                    | GAGGCTACCCTAGACACAAGG   | GGGTGCCGTTGCTCATCATA    |
| <i>atg7</i>                    | CTTCGCCCCCTTTAATAGTGC   | TGAACTCCAACGTCAAGCGG    |
| <i>lc3</i>                     | TTATAGAGCGATACAAGGGGGAG | CGCCGTCTGATTATCTTGATGAG |
| <i>lamp2a</i>                  | TTGTGGCAGGGTTGATGTTA    | CACCCACTCCAACCTCCAACCT  |
| <i>tnf-<math>\alpha</math></i> | TCGTAGCAAACCAACCAAGTG   | ATATAGCAAATCGGCTGACG    |
| <i>il-1<math>\beta</math></i>  | ACTCCTTAGTCCTCGGCCA     | TGGTTTCTTGTGACCCTGAGC   |
| <i>cxcl1</i>                   | CCCAAACCGAAGTCATAGCC    | TCAGAAGCCAGCGTTCACC     |
| <i>cxcl2</i>                   | GCCCAGACAGAAGTCATAGCC   | TTCTCTTTGGTTCTTCCGTTGA  |
| <i>9 s</i>                     | GACTCCGGAACAAACGTGAGG   | CTTCATCTTGCCCTCGTCCA    |

---

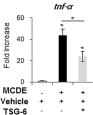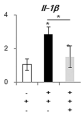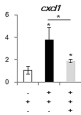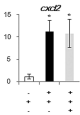

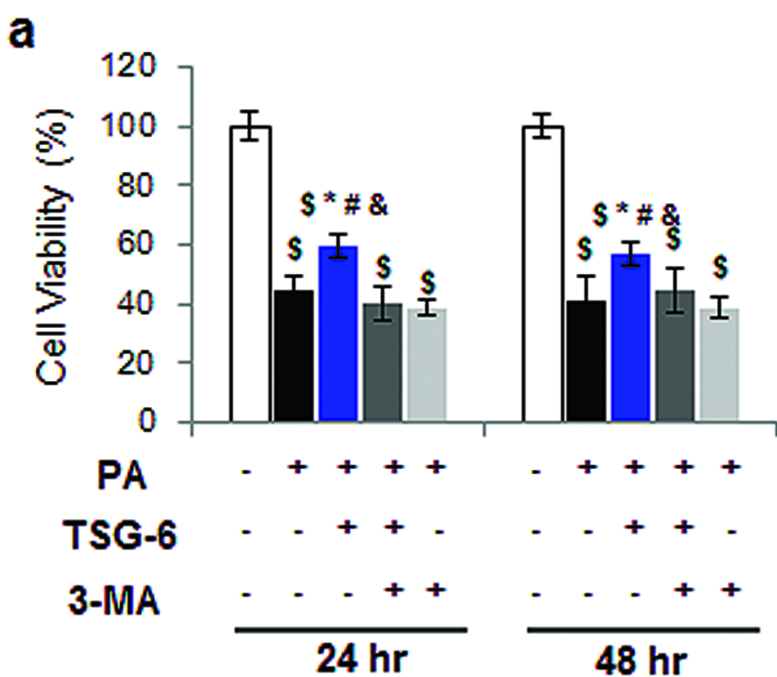

\$ : vs Control (no treatment)

\* : vs PA + vehicle

# : vs PA+TSG-6 +3-MA

& : vs PA+3-MA

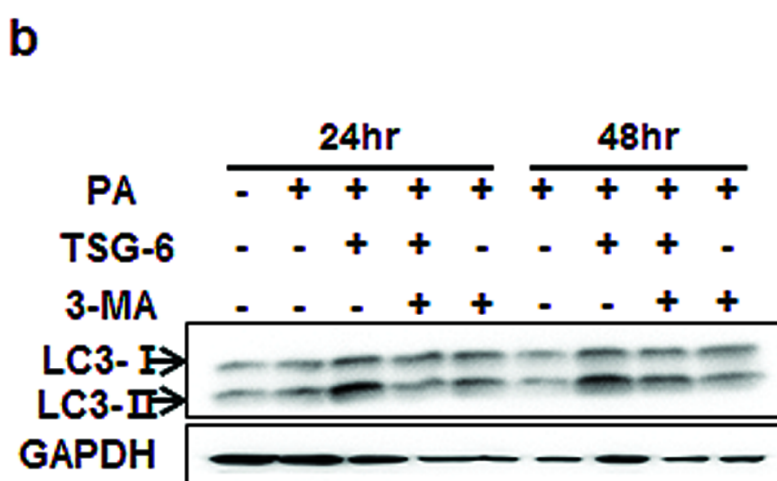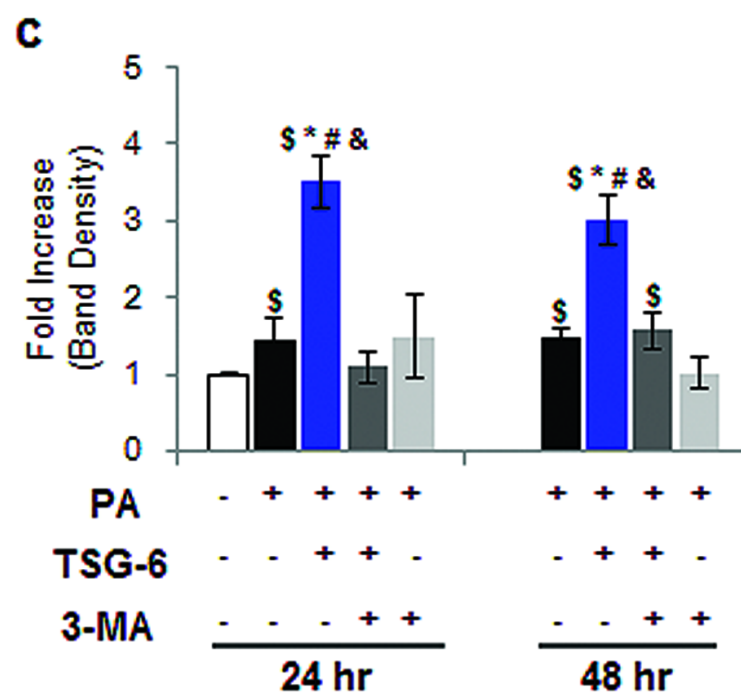

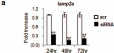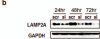

□ No Treat ■ scr+TM or PA ■ scr+TSG-6+TM or PA ■ siRNA+TSG-6+TM or PA □ siRNA+TM or PA

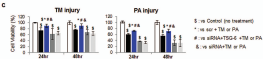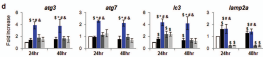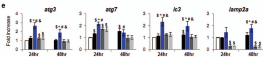

**a**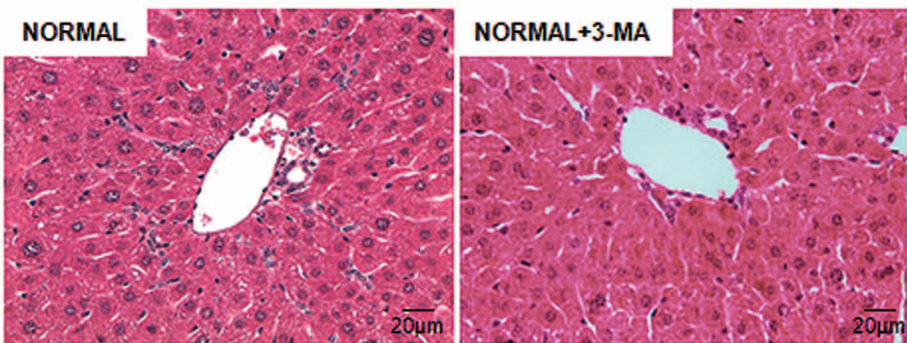**b**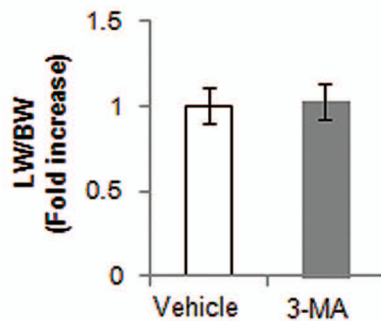**c**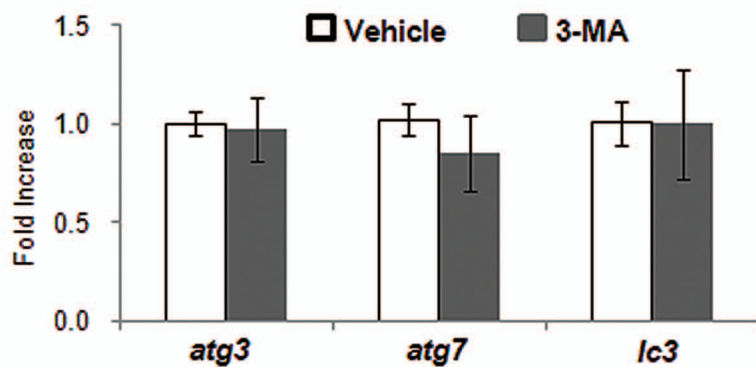**d**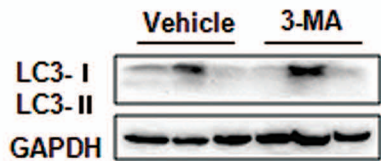

Supplement: emm2017140x1.pdf [file emm2017140x1.pdf]
